# Supplementary material for: VISTA expression is associated with a favorable prognosis in patients with high-grade serous ovarian cancer
Source: Springer Nature journal article supplement (doi:10.1007/s00262-019-02434-5), 2019-11-28

## Supplementary Figures

**Fig. S1** No association was observed between V-domain Ig suppressor of T cell activation (VISTA) expression in immune cells (ICs) or all cells combined (tumor cells, ICs, and endothelial cells) and survival in patients with high-grade serous ovarian carcinomas. (a) Association between VISTA expression in ICs and progression-free survival (PFS); (b) association between VISTA expression in ICs and overall survival (OS), (c) association between VISTA expression in all cells and PFS, (d) association between VISTA expression in all cells and OS.

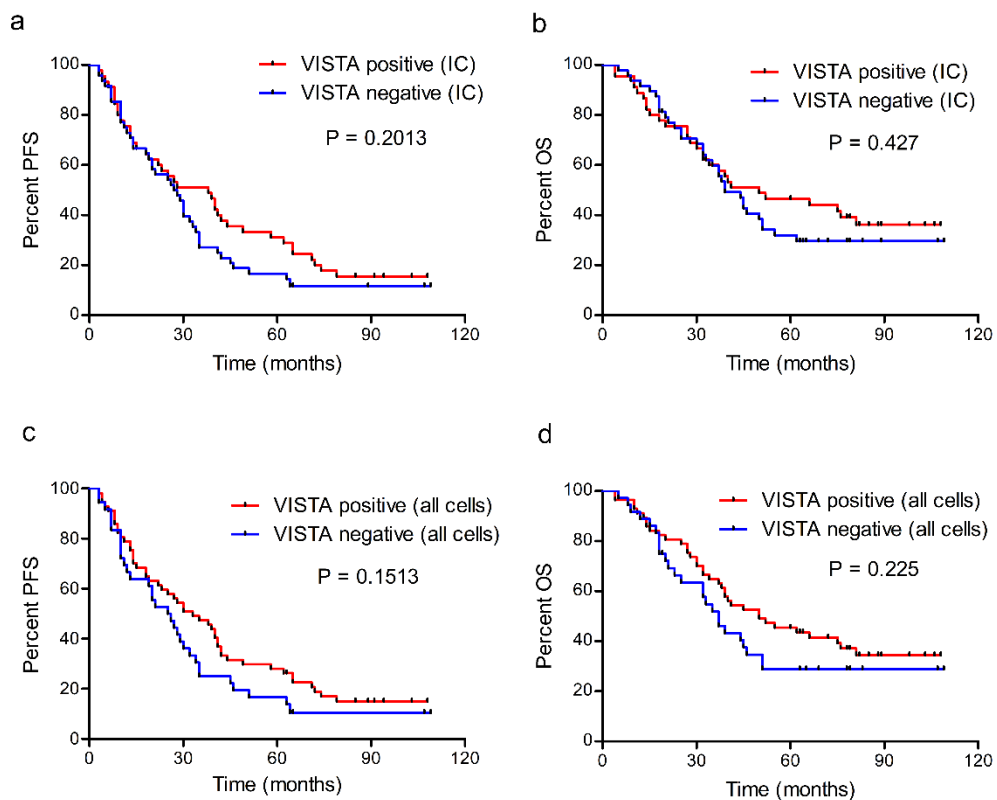

**Fig. S2** No association was observed between programmed cell death-ligand 1 (PD-L1) expression and (a) progression-free survival (PFS) or (b) overall survival (OS) in patients with high-grade serous ovarian carcinomas.

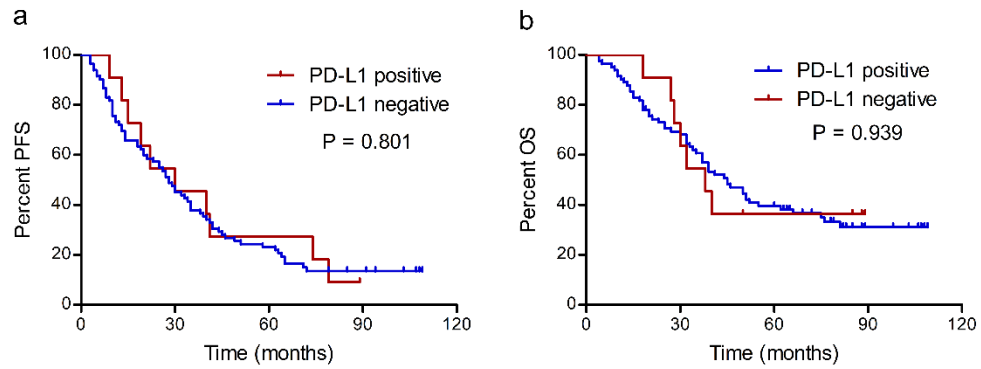

Supplement: MOESM1 [file 17445204]
